# Supplementary material
Source: PubMed Central journal article supplement (PMC5243857)

BCL2

3

2

1

-10

0

10

20

30

Trichostatin DRS

$PCC = -0.2$

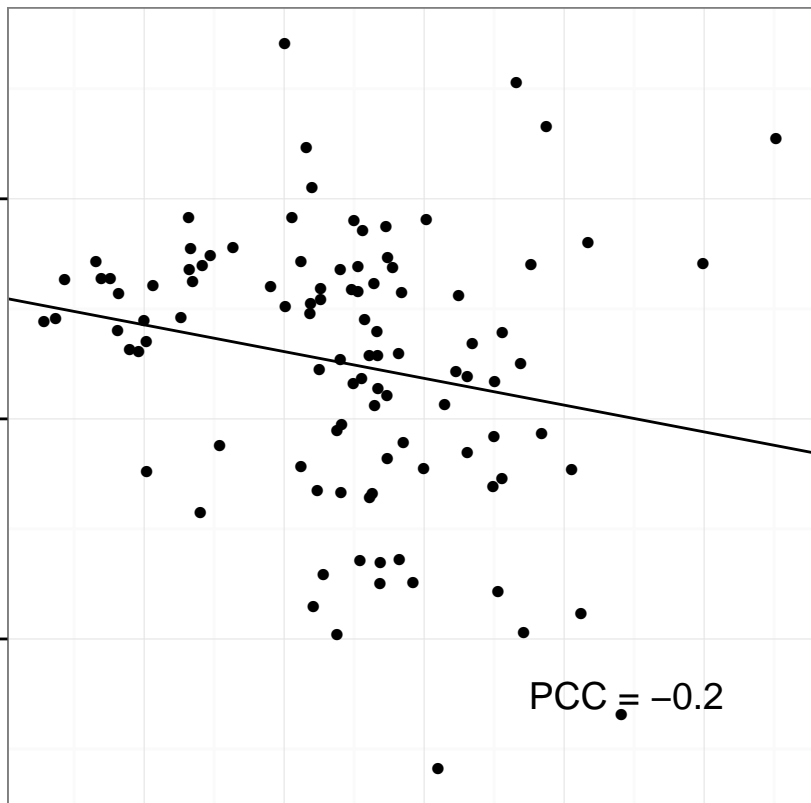

Supplement: NIHMS840865-supplement-Suppl__S3.pdf [file NIHMS840865-supplement-Suppl__S3.pdf]
